# Supplementary material
Source: PubMed Central journal article supplement (PMC9990745)
Supplement: NIHMS1870721-supplement-suppl_material.pdf [file NIHMS1870721-supplement-suppl_material.pdf]

*Asthma-specific job exposure matrix: Online Supplement*

**Development of an asthma-specific job exposure matrix for use in the United States: Online Supplement**

PK Henneberger,<sup>1</sup> LM Kurth,<sup>1</sup> B Doney,<sup>1</sup> X Liang,<sup>1</sup> E Andersson<sup>2</sup>

<sup>1</sup>Respiratory Health Division, National Institute for Occupational Safety and Health, Centers for Disease Control and Prevention, Morgantown, WV, USA

<sup>2</sup>Department of Occupational and Environmental Medicine, Sahlgrenska University Hospital , Gothenburg, Sweden

Online Supplement Figure 1. Frequency that SOC 2010 Detailed Occupations were assigned different numbers of exposures at two points in development of USA-JEM: just after transferring exposures from the N-JEM based on cross walking from the ISCO-88 codes, and later after evaluation and revision<sup>a</sup>

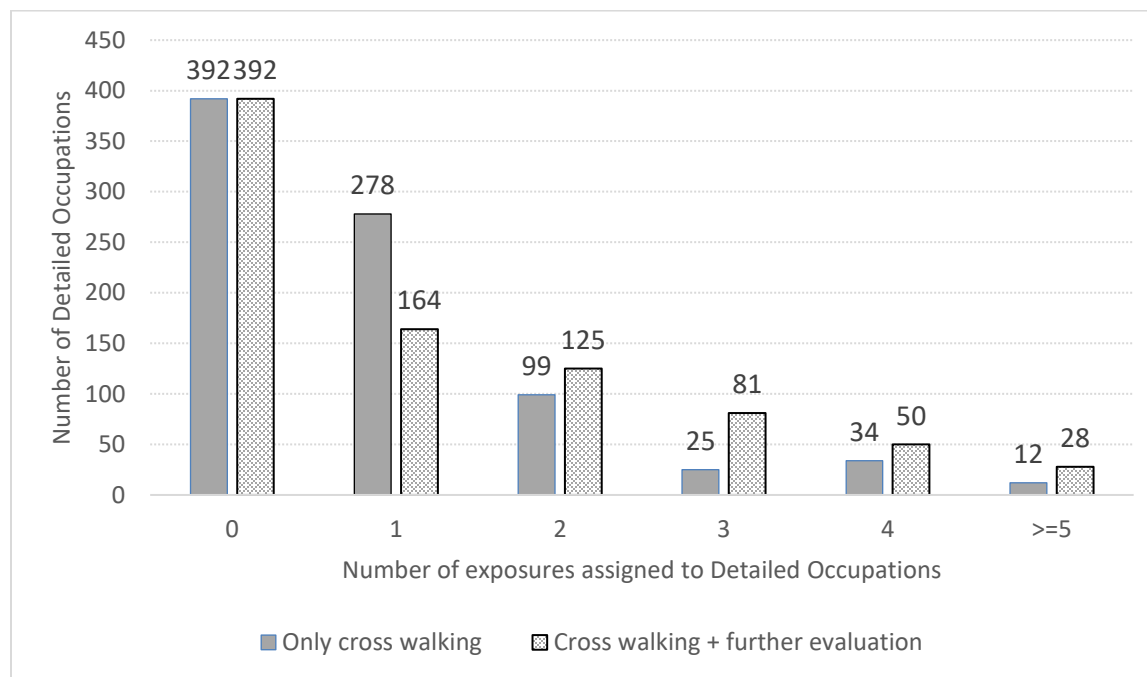

<sup>a</sup> The median number of exposures was one for both only cross walking and cross walking + further evaluation, but the means were 0.91 and 1.22, respectively. After evaluation and revisions, the numbers indicated represent the combination of *probable* and *possible* exposures in the USA-JEM.

Online Supplement Table 1. Number (%) of SOC-2010 Detailed Occupations in the Major Occupation Groups with exposure to at least one WRA agent just after cross walking, and then later after evaluation and revision with *probable* or *possible* exposure to at least one WRA agent

| <b>SOC-2010 Major Occupation Group Code and Title</b>  | <b>N<sup>a</sup></b> | <b>Number (%) of occupations with at least one exposure as assigned by N-JEM, brought over by cross walking</b> | <b>Number (%) of occupations with at least one <i>probable</i> or <i>possible</i> exposure later after evaluation and revision of cross walked assignments</b> |
|--------------------------------------------------------|----------------------|-----------------------------------------------------------------------------------------------------------------|----------------------------------------------------------------------------------------------------------------------------------------------------------------|
| 11-0000 Management                                     | 34                   | 3 (8.8)                                                                                                         | 5 (14.7)                                                                                                                                                       |
| 13-0000 Business and Financial Operations              | 32                   | 1 (3.1)                                                                                                         | 0 (0)                                                                                                                                                          |
| 15-0000 Computer and Mathematical                      | 19                   | 0 (0)                                                                                                           | 0 (0)                                                                                                                                                          |
| 17-0000 Architecture and Engineering                   | 35                   | 12 (34.3)                                                                                                       | 10 (28.6)                                                                                                                                                      |
| 19-0000 Life, Physical, and Social Science             | 43                   | 19 (44.2)                                                                                                       | 16 (37.2)                                                                                                                                                      |
| 21-0000 Community and Social Service                   | 18                   | 3 (16.7)                                                                                                        | 3 (16.7)                                                                                                                                                       |
| 23-0000 Legal                                          | 9                    | 4 (44.4)                                                                                                        | 0 (0)                                                                                                                                                          |
| 25-0000 Education, Training, and Library               | 63                   | 1 (1.6)                                                                                                         | 14 (22.2)                                                                                                                                                      |
| 27-0000 Arts, Design, Entertainment, Sports, and Media | 41                   | 7 (17.1)                                                                                                        | 5 (12.2)                                                                                                                                                       |
| 29-0000 Healthcare Practitioners and Technical         | 61                   | 37 (60.7)                                                                                                       | 54 (88.5)                                                                                                                                                      |
| 31-0000 Healthcare Support                             | 17                   | 13 (76.5)                                                                                                       | 16 (94.1)                                                                                                                                                      |
| 33-0000 Protective Service                             | 22                   | 22 (100)                                                                                                        | 17 (77.3)                                                                                                                                                      |
| 35-0000 Food Preparing and Serving Related             | 18                   | 18 (100)                                                                                                        | 18 (100)                                                                                                                                                       |
| 37-0000 Building and Grounds Cleaning and Maintenance  | 10                   | 10 (100)                                                                                                        | 10 (100)                                                                                                                                                       |
| 39-0000 Personal Care and Service                      | 33                   | 23 (69.7)                                                                                                       | 19 (57.6)                                                                                                                                                      |
| 41-0000 Sales and Related                              | 22                   | 1 (4.6)                                                                                                         | 2 (9.1)                                                                                                                                                        |
| 43-0000 Office and Administrative Support              | 56                   | 10 (17.9)                                                                                                       | 9 (16.1)                                                                                                                                                       |
| 45-0000 Farming, Fishing, and Forestry                 | 15                   | 15 (100)                                                                                                        | 15 (100)                                                                                                                                                       |
| 47-0000 Construction and Extraction                    | 60                   | 59 (98.3)                                                                                                       | 58 (96.7)                                                                                                                                                      |
| 49-0000 Installation, Maintenance, and Repair          | 52                   | 50 (96.2)                                                                                                       | 28 (53.8)                                                                                                                                                      |
| 51-0000 Production                                     | 108                  | 101 (93.5)                                                                                                      | 96 (88.9)                                                                                                                                                      |
| 53-0000 Transportation and Material Moving             | 52                   | 39 (75)                                                                                                         | 44 (84.6)                                                                                                                                                      |
| 55-0000 Military Specific                              | 20                   | 0 (0)                                                                                                           | 9 (45.0)                                                                                                                                                       |
| <b>TOTAL</b>                                           | <b>840</b>           | <b>448 (53.3)</b>                                                                                               | <b>448 (53.3)</b>                                                                                                                                              |

<sup>a</sup> N = total number of detailed occupations in Major Occupation Group

Online Supplement Table 2. Number of SOC-2010 Detailed Occupations assigned different exposures either just after cross walking the NJEM exposure codes and later after evaluation and revision

| USA-JEM Category | Asthma Exposure                               | Exposure Codes |         | Number of occupations |         |
|------------------|-----------------------------------------------|----------------|---------|-----------------------|---------|
|                  |                                               | N-JEM          | USA-JEM | N-JEM                 | USA-JEM |
| LMW Agents       | Highly reactive LMW agents, other             | A              | ABC     | 122                   | 114     |
|                  | Highly reactive agents, acrylates             | B              |         |                       |         |
|                  | Highly reactive agents, epoxy (Di)isocyanates | C              |         |                       |         |
|                  |                                               | P              | P       | 40                    | 44      |
| HMW Agents       | Animal-derived antigens                       | H              | H       | 28                    | 29      |
|                  | Plant antigens                                | I              | I       | 17                    | 33      |
|                  | Latex                                         | D              | D       | 42                    | 68      |
|                  | Other HMW biological agents                   | K              | K       | 36                    | 31      |
| Mixed Agents     | Pharmaceutical products (drugs)               | S              | S       | 9                     | 21      |
|                  | Pest control agents                           | NA             | PEST    | NA                    | 40      |
|                  | Metal working fluids                          | G              | G       | 32                    | 22      |
|                  | Highly reactive disinfectants and sterilants  | M              | DIS     | 9                     | 119     |
| Cleaning Agents  | M                                             |                |         |                       |         |
| Irritant Agents  | Organic dust, wood                            | E              | EW      | 26                    | 47      |
|                  | Organic dust, paper                           |                | EP      |                       |         |
|                  | Organic dust, textile                         | F              | F       | 16                    | 22      |
|                  | Inorganic dust and fumes, metals              | O              | Ometal  | 108                   | 151     |
|                  | Inorganic dust and fumes, multiple sources    |                | Omulti  |                       |         |
|                  | Second-hand tobacco smoke                     | N              | N       | 21                    | 18      |
|                  | Exhaust and smoke from combustion             | L              | L       | 80                    | 122     |
|                  | Peak exposure                                 | T              | T       | 29                    | 51      |
| Other            | U                                             | NA             | 129     | NA                    |         |

Abbreviations: HMW=high molecular weight; LMW=low molecular weight; Mixed= mixed HMW and LMW; NA = not applicable

Online Supplement Table 3. Number of 2010 SOC Detailed Occupations in Major Occupation Groups with *probable* or *possible* exposure, by the 19 agents in the USA-JEM

| Occupations                                   |       | LMW Agents          |               | HMW Agents |       |       |                    | Mixed          |                     |                      |               | Irritant Agents |                    |                     |                       |                        |                        | Peak              | Unexp             |                        |                        |
|-----------------------------------------------|-------|---------------------|---------------|------------|-------|-------|--------------------|----------------|---------------------|----------------------|---------------|-----------------|--------------------|---------------------|-----------------------|------------------------|------------------------|-------------------|-------------------|------------------------|------------------------|
|                                               |       | Highly reactive LMW | Diisocyanates | Animal     | Plant | Latex | Oth HMW bio agents | Pharmaceutical | Pest Control Agents | Metal Working Fluids | Disinfectants | Cleaning agents | Organic dust, wood | Organic dust, paper | Organic dust, textile | Inorganic dust, metals | Inorg.anic dust, multi | Second hand smoke | Exhaust and smoke | Peak irritant exposure | Unexposed <sup>a</sup> |
| Major Occupation Group Code and Title         | Total | ABC                 | P             | H          | I     | D     | K                  | S              | PEST                | G                    | DIS           | M               | EW                 | EP                  | F                     | Ometal                 | Omulti                 | N                 | L                 | T                      | UN                     |
| 11-0000 Management                            | 34    | 0                   | 0             | 1          | 1     | 0     | 0                  | 0              | 1                   | 0                    | 0             | 0               | 1                  | 0                   | 0                     | 0                      | 2                      | 1                 | 3                 | 0                      | 29                     |
| 13-0000 Business and Financial Operations     | 32    | 0                   | 0             | 0          | 0     | 0     | 0                  | 0              | 0                   | 0                    | 0             | 0               | 0                  | 0                   | 0                     | 0                      | 0                      | 0                 | 0                 | 0                      | 32                     |
| 15-0000 Computer and Mathematical Occupations | 19    | 0                   | 0             | 0          | 0     | 0     | 0                  | 0              | 0                   | 0                    | 0             | 0               | 0                  | 0                   | 0                     | 0                      | 0                      | 0                 | 0                 | 0                      | 19                     |
| 17-0000 Architecture and Engineering          | 35    | 2                   | 0             | 0          | 0     | 0     | 0                  | 0              | 0                   | 0                    | 0             | 0               | 0                  | 0                   | 0                     | 3                      | 5                      | 0                 | 2                 | 4                      | 25                     |
| 19-0000 Life, Physical, and Social Science    | 43    | 5                   | 0             | 2          | 2     | 2     | 3                  | 0              | 6                   | 0                    | 3             | 2               | 1                  | 0                   | 0                     | 1                      | 3                      | 0                 | 0                 | 3                      | 27                     |
| 21-0000 Community                             | 18    | 0                   | 0             | 0          | 0     | 1     | 0                  | 0              | 0                   | 0                    | 0             | 0               | 0                  | 0                   | 0                     | 0                      | 0                      | 2                 | 0                 | 0                      | 15                     |

## Asthma-specific job exposure matrix: Online Supplement

| Occupations                                            |       | LMW Agents          |               | HMW Agents |       |       |                    | Mixed          |                     |                      |               | Irritant Agents |                    |                     |                       |                        |                       | Peak              | Unexp             |                        |                        |
|--------------------------------------------------------|-------|---------------------|---------------|------------|-------|-------|--------------------|----------------|---------------------|----------------------|---------------|-----------------|--------------------|---------------------|-----------------------|------------------------|-----------------------|-------------------|-------------------|------------------------|------------------------|
|                                                        |       | Highly reactive LMW | Diisocyanates | Animal     | Plant | Latex | Oth HMW bio agents | Pharmaceutical | Pest Control Agents | Metal Working Fluids | Disinfectants | Cleaning agents | Organic dust, wood | Organic dust, paper | Organic dust, textile | Inorganic dust, metals | Inorganic dust, multi | Second hand smoke | Exhaust and smoke | Peak irritant exposure | Unexposed <sup>a</sup> |
| Major Occupation Group Code and Title                  | Total | ABC                 | P             | H          | I     | D     | K                  | S              | PEST                | G                    | DIS           | M               | EW                 | EP                  | F                     | Ometal                 | Omulti                | N                 | L                 | T                      | UN                     |
| and Social Service                                     |       |                     |               |            |       |       |                    |                |                     |                      |               |                 |                    |                     |                       |                        |                       |                   |                   |                        |                        |
| 23-0000 Legal                                          | 9     | 0                   | 0             | 0          | 0     | 0     | 0                  | 0              | 0                   | 0                    | 0             | 0               | 0                  | 0                   | 0                     | 0                      | 0                     | 0                 | 0                 | 0                      | 9                      |
| 25-0000 Education, Training, and Library               | 63    | 0                   | 0             | 1          | 2     | 1     | 1                  | 0              | 0                   | 0                    | 6             | 9               | 1                  | 0                   | 1                     | 0                      | 0                     | 0                 | 0                 | 0                      | 49                     |
| 27-0000 Arts, Design, Entertainment, Sports, and Media | 41    | 1                   | 0             | 0          | 1     | 0     | 0                  | 0              | 1                   | 0                    | 0             | 0               | 1                  | 0                   | 1                     | 2                      | 1                     | 1                 | 0                 | 0                      | 36                     |
| 29-0000 Healthcare Practitioners and Technical         | 61    | 4                   | 0             | 2          | 0     | 43    | 0                  | 13             | 1                   | 0                    | 48            | 8               | 0                  | 0                   | 0                     | 5                      | 0                     | 0                 | 0                 | 5                      | 7                      |
| 31-0000 Healthcare Support                             | 17    | 1                   | 0             | 1          | 0     | 11    | 0                  | 1              | 1                   | 0                    | 15            | 8               | 0                  | 0                   | 0                     | 0                      | 0                     | 0                 | 0                 | 1                      | 1                      |
| 33-0000 Protective Service                             | 22    | 2                   | 2             | 2          | 1     | 3     | 0                  | 0              | 2                   | 0                    | 1             | 1               | 0                  | 0                   | 0                     | 1                      | 1                     | 3                 | 8                 | 9                      | 5                      |

## Asthma-specific job exposure matrix: Online Supplement

| Occupations                                           |       | LMW Agents          |               | HMW Agents |       |       |                    | Mixed          |                     |                      |               | Irritant Agents |                    |                     |                       |                        |                       | Peak              | Unexp             |                        |                        |
|-------------------------------------------------------|-------|---------------------|---------------|------------|-------|-------|--------------------|----------------|---------------------|----------------------|---------------|-----------------|--------------------|---------------------|-----------------------|------------------------|-----------------------|-------------------|-------------------|------------------------|------------------------|
|                                                       |       | Highly reactive LMW | Diisocyanates | Animal     | Plant | Latex | Oth HMW bio agents | Pharmaceutical | Pest Control Agents | Metal Working Fluids | Disinfectants | Cleaning agents | Organic dust, wood | Organic dust, paper | Organic dust, textile | Inorganic dust, metals | Inorganic dust, multi | Second hand smoke | Exhaust and smoke | Peak irritant exposure | Unexposed <sup>a</sup> |
| Major Occupation Group Code and Title                 | Total | ABC                 | P             | H          | I     | D     | K                  | S              | PEST                | G                    | DIS           | M               | EW                 | EP                  | F                     | Ometal                 | Omulti                | N                 | L                 | T                      | UN                     |
| 35-0000 Food Prep and Serving Related                 | 18    | 0                   | 0             | 0          | 0     | 2     | 0                  | 0              | 0                   | 0                    | 15            | 12              | 0                  | 0                   | 0                     | 0                      | 0                     | 4                 | 8                 | 0                      | 0                      |
| 37-0000 Building and Grounds Cleaning and Maintenance | 10    | 0                   | 0             | 1          | 4     | 0     | 4                  | 0              | 6                   | 0                    | 4             | 4               | 3                  | 0                   | 0                     | 0                      | 2                     | 0                 | 3                 | 4                      | 0                      |
| 39-0000 Personal Care and Service                     | 33    | 7                   | 0             | 2          | 0     | 5     | 1                  | 0              | 2                   | 0                    | 8             | 5               | 0                  | 0                   | 0                     | 0                      | 0                     | 5                 | 0                 | 1                      | 14                     |
| 41-0000 Sales and Related                             | 22    | 0                   | 0             | 0          | 0     | 0     | 0                  | 0              | 0                   | 0                    | 0             | 0               | 0                  | 0                   | 0                     | 0                      | 0                     | 1                 | 1                 | 0                      | 20                     |
| 43-0000 Office and Administrative Support             | 56    | 0                   | 0             | 0          | 0     | 0     | 0                  | 0              | 0                   | 0                    | 0             | 0               | 0                  | 5                   | 0                     | 0                      | 0                     | 1                 | 3                 | 0                      | 47                     |
| 45-0000 Farming, Fishing, and Forestry                | 15    | 0                   | 0             | 8          | 11    | 0     | 10                 | 1              | 8                   | 0                    | 1             | 1               | 5                  | 0                   | 5                     | 0                      | 3                     | 0                 | 6                 | 0                      | 0                      |
| 47-0000 Construction and Extraction                   | 60    | 23                  | 14            | 0          | 0     | 0     | 1                  | 0              | 3                   | 0                    | 0             | 0               | 9                  | 1                   | 1                     | 17                     | 47                    | 0                 | 24                | 6                      | 2                      |
| 49-0000 Installation,                                 | 52    | 16                  | 3             | 0          | 0     | 0     | 0                  | 0              | 1                   | 4                    | 0             | 0               | 0                  | 0                   | 1                     | 13                     | 5                     | 0                 | 11                | 0                      | 24                     |

## Asthma-specific job exposure matrix: Online Supplement

| Occupations                                |       | LMW Agents          |               | HMW Agents |       |       |                    | Mixed          |                     |                      |               | Irritant Agents |                    |                     |                       |                        |                       | Peak              | Unexp             |                        |                        |
|--------------------------------------------|-------|---------------------|---------------|------------|-------|-------|--------------------|----------------|---------------------|----------------------|---------------|-----------------|--------------------|---------------------|-----------------------|------------------------|-----------------------|-------------------|-------------------|------------------------|------------------------|
|                                            |       | Highly reactive LMW | Diisocyanates | Animal     | Plant | Latex | Oth HMW bio agents | Pharmaceutical | Pest Control Agents | Metal Working Fluids | Disinfectants | Cleaning agents | Organic dust, wood | Organic dust, paper | Organic dust, textile | Inorganic dust, metals | Inorganic dust, multi | Second hand smoke | Exhaust and smoke | Peak irritant exposure | Unexposed <sup>a</sup> |
| Major Occupation Group Code and Title      | Total | ABC                 | P             | H          | I     | D     | K                  | S              | PEST                | G                    | DIS           | M               | EW                 | EP                  | F                     | Ometal                 | Omulti                | N                 | L                 | T                      | UN                     |
| Maintenance, and Repair                    |       |                     |               |            |       |       |                    |                |                     |                      |               |                 |                    |                     |                       |                        |                       |                   |                   |                        |                        |
| 51-0000 Production                         | 108   | 52                  | 24            | 9          | 11    | 0     | 10                 | 6              | 8                   | 18                   | 12            | 4               | 13                 | 10                  | 13                    | 42                     | 21                    | 0                 | 5                 | 15                     | 12                     |
| 53-0000 Transportation and Material Moving | 52    | 1                   | 1             | 0          | 0     | 0     | 1                  | 0              | 0                   | 0                    | 1             | 1               | 1                  | 1                   | 0                     | 1                      | 8                     | 0                 | 39                | 1                      | 8                      |
| 55-0000 Military Specific                  | 20    | 0                   | 0             | 0          | 0     | 0     | 0                  | 0              | 0                   | 0                    | 0             | 0               | 0                  | 0                   | 0                     | 0                      | 2                     | 0                 | 9                 | 2                      | 11                     |
| TOTAL                                      | 840   | 114                 | 44            | 29         | 33    | 68    | 31                 | 21             | 40                  | 22                   | 114           | 55              | 35                 | 17                  | 22                    | 85                     | 100                   | 18                | 122               | 51                     | 392                    |

<sup>a</sup> 'Unexposed' means that the USA-JEM assigned neither *probable* nor *possible* exposure to the detailed occupation.
